# Evaluating temperature and humidity gradients of COVID-19 infection rates in light of Non-Pharmaceutical Interventions

Joshua Choma<sup>a</sup>, Fabio Correa<sup>d</sup>, Salah-Eddine Dahbi<sup>a</sup>, Kentaro Hayasi<sup>c</sup>, Benjamin Lieberman<sup>a</sup>, Caroline Maslo<sup>e</sup>, Bruce Mellado<sup>a,b</sup>, Kgomotso Monnakgotla<sup>a</sup>, Jacques Naudé<sup>f</sup>, Xifeng Ruan<sup>a</sup>, Finn Stevenson<sup>a</sup>

<sup>a</sup>*School of Physics and Institute for Collider Particle Physics, University of the Witwatersrand, Johannesburg, Wits 2050, South Africa*

<sup>b</sup>*iThemba LABS, National Research Foundation, P.O. Box 722, Somerset West 7129, South Africa*

<sup>c</sup>*School of Computer Science and Applied Mathematics, University of the Witwatersrand, Johannesburg, Wits 2050, South Africa*

<sup>d</sup>*Department of Statistics, Rhodes University, Grahamstown 6139, South Africa*

<sup>e</sup>*Department of Quality Leadership, Netcare Hospitals, Johannesburg, South Africa*

<sup>f</sup>*Biomedical Engineering Research Group, School of Electrical and Information Engineering, University of the Witwatersrand, Johannesburg, South Africa*

---

## Abstract

We evaluate potential temperature and humidity impact on the infection rate of COVID-19 with a data up to June 10<sup>th</sup> 2020, which comprises a large geographical footprint. It is critical to analyse data from different countries or regions at similar stages of the pandemic in order to avoid picking up false gradients. The degree of severity of NPIs is found to be a good gauge of the stage of the pandemic for individual countries. Data points are classified according to the stringency index of the NPIs in order to ensure that comparisons between countries are made on equal footing. We find that temperature and relative humidity gradients don't significantly deviate from the zero-gradient hypothesis. Upper limits on the absolute value of the gradients are set. The procedure chosen here yields  $6 \cdot 10^{-3} \text{ }^\circ\text{C}^{-1}$  and  $3.3 \cdot 10^{-3} (\%)^{-1}$  upper limits on the absolute values of the temperature and relative humidity gradients, respectively, with a 95% Confidence Level. These findings do not preclude existence of seasonal effects and are indicative that these are likely to be nuanced.

### Keywords:

SARS-CoV, COVID-19, Transmission rate, Temperature, Humidity, Non-pharmaceutical Interventions

---

## 1. Introduction

In the last century the world has previously experienced three pandemics [1], the Asian, Spanish and Hong Kong influenza viruses. These pandemics had widespread consequences killing millions of people around the world [2, 3, 4]. There are many different factors that effect the transmission rate of a specific pandemic. These factors include, but are not limited to, climate change conditions, population density and medical quality [5]. The most recent pandemic is the novel COVID-19 Coronavirus caused by severe acute respiratory syndrome Coronavirus 2 (SARS-CoV-2) [6, 5]. The initial outbreak took place in December 2019 in Wuhan city, Hubei province, China [7]. This virus was declared pandemic by the World Health Organisation (WHO) on March 11, 2020 after it had spread into more than 114 countries with a total of 118,000 cases at the time [8]. As of June 18, 2020 the total number of cases identified by the WHO stands at around 8.2 million with fatalities reported at 445 thousands [9]. The spread of this virus is mainly based on human-to-human contact or droplets [10].

This paper aims to address the seasonality of the COVID-19 virus and whether it is driven by macroscopic temperature and/or humidity gradients. As the Southern Hemisphere has plunged into winter, concerns emerge regarding possible acceleration of the spread. Conversely, the Northern Hemisphere has transitioned to summer, where some countries appear confident that warmer weather will ease pressures from the pandemic.

A number of studies have been performed at different stages of the pandemic globally. Currently, the pandemic has reached a stage where many countries have completed their "first wave". This wave cycle is defined by a slow initial growth, followed by an acceleration leading to an apex and then a gradual decline. However, the evolution of the pandemic does not occur in the same time frame for all countries. The length of the cycle and its initial parameters

20 vary from country to country. If one analyses the infection rate in different countries at a fixed time it is possible to run  
21 into the error of comparing outcomes at different stages of the pandemic. For instance, at a given time a country can  
22 be at the early stages of the pandemic, which is characterized by low infection rates, while another can on be its way  
23 to reaching the apex with large infection rates. If both countries happen to display different temperatures or humidity  
24 levels, the analysis will yield an apparent gradient. Also, if one analyses infection rates over prolonged periods of time  
25 over which climatic conditions change significantly in a country, the analysis will also pick up an apparent gradient  
26 in the absence of genuine dependencies. The "first wave" in Europe commenced towards the end of the winter and  
27 was completed in the spring. At the time when the infection rates were large in some European countries in other  
28 continents, such as South America which happened to be warmer and more humid, displayed lower infection rates.  
29 From here One may be tempted to conclude on the presence of a gradient.

30 In order to reduce the probability of picking false gradients it is essential to compare infections rates for different  
31 countries at similar stages of the progression of the pandemic. Given the large geographical footprint of the pandemic  
32 attained so far it is possible to achieve a large enough differential in temperature and humidity in order to pin down  
33 potential macroscopic gradients. This is achieved here by classifying the data according to the level of severity of  
34 the non-pharmaceutical interventions (NPIs) applied in a country. We find that the severity of the total NPI policy  
35 is a good metric to gauge the progression of the pandemic. It must also be noted that countries with a number of  
36 positive cases below a certain threshold are not considered. This is motivated by the need to exclude countries that  
37 find themselves at the early stages of the pandemic, which is a difficult period to model. Several measures have been  
38 put in place by different countries in an attempt to limit the spread of this virus. Most countries around the world have  
39 adopted similar regulation related to combating the spread of COVID-19. Some of the most widespread strategies are:  
40 lockdown implementation, bans on mass gatherings, the closure of schools and work places and travel restrictions. A  
41 stringency index introduced by the Oxford COVID-19 Government Response Tracker team can be used to provide a  
42 picture of the stage at which any country enforced its strongest measures. The index is a number from 0 to 100 that  
43 reflects a weighted average of the individual indicators indicators (related to each implemented NPI). A higher index  
44 score indicates a higher level of stringency.

45 In our work we are looking at countries with more than 5000 cases and thus far as of June 10, 2020 there are 65  
46 countries that fit the criteria. Other human Corona viruses such as SARS-CoV and Middle East Respiratory Syndrome  
47 (MERS-CoV) survived for 2 - 9 days on different materials surfaces under high temperatures such as 30° [11]. Their  
48 survival increased to 28 days under lower temperatures such as 4°. Additionally, SARS-CoV survives longer under  
49 lower temperatures and relative humidity, which could be the reason why countries with high temperature and relative  
50 humidity such as Malaysia, Indonesia and Thailand did not have major outbreaks of SARS-CoV in 2003 [12]. Several  
51 studies concluded that low temperature [13, 14] and low humidity favor the transmission of the virus [5, 15]. From  
52 this it is expected that the spread will reduce with a rise in both temperature and humidity. In contrast to these, there  
53 are studies which suggest that temperature does not play any significant role in the spread of COVID-19 [16, 17, 18].  
54 Prata et al. [19] found a negative correlation between temperatures and number of daily cases of COVID-19 within  
55 the range 16.84°C to 25.84°C. However, the study shows that there is no evidence that there will be a decrease in the  
56 number of cases for temperatures above 25.84°C.

## 57 **2. Non-Pharmaceutical Interventions and the Stringency Index**

58 Non-pharmaceutical Interventions, or NPIs, are response measures put in place by a government to try and combat  
59 the spread of virus or infectious disease. There are a number of NPIs that most governments across the world have  
60 enforced. A global analysis of the impact of NPIs on the COVID-19 spread dynamics have shown that it is valuable to  
61 use a stringency index to classify these NPIs. The global analysis was done using the Oxford COVID-19 Government  
62 Response Team (OxCGRT) [20] stringency index as well as an adapted US stringency index that was designed by our  
63 team to be as similar as the OxCGRT index as possible for comparison purposes. The world average for the coefficient  
64 that linearises the level of transmission with respect to the OxCGRT stringency index is  $\alpha_s = 0.01 \pm 0.0017$  (95%  
65 C.I.) [21].

66 The OxCGRT stringency [22],  $p$  in our notation, can be understood as a number from 0-100 that is a weighted  
67 average of a number of relevant NPI indicators. The OxCGRT has created a database of NPI indicators and the  
68 corresponding dates of initiation. The stringency index is also included in this database. The OxCGRT stringency  
69 index can be useful in quantifying and characterising a country's response to the COVID-19 pandemic. This makes

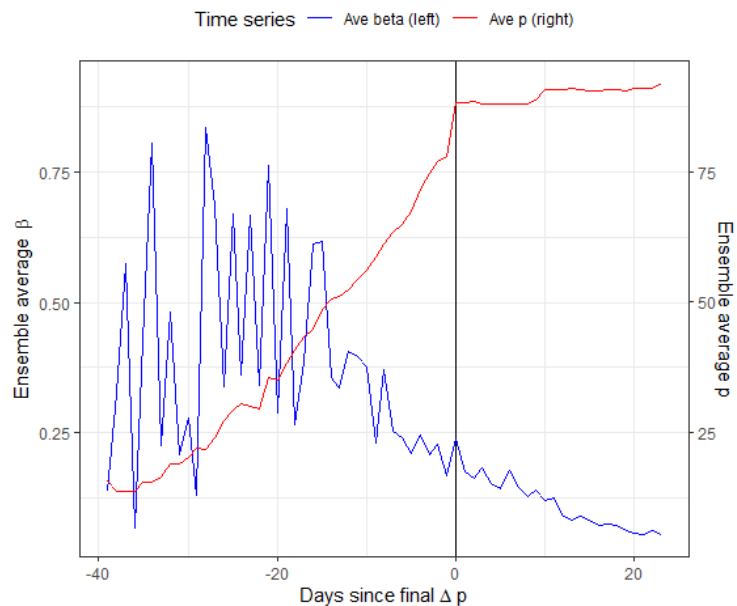

Figure 1: Comparison of ensemble average NPI stringency index,  $p$ , against the ensemble average of infection rates,  $\beta$ , as a function of days from the last major change in control value.

70 it a useful comparative parameter. It can also be used to show the progression of a pandemic in a country and to  
 71 determine an overall classification of a response as "tight" or "loose" control.

72 Figure 1 illustrates the impact of NPIs on the infection rate of the pandemic. The graph is obtained from data of  
 73 47 countries and states of the US before the release of lockdown restrictions. This graph bears witness of the strong  
 74 correlation between the application of the NPIs and the control over the pandemic.

75 The OxCGRT original version that was used for this paper takes into account the following NPIs in the stringency  
 76 index calculation:

- 77 1. S1 - School Closure
- 78 2. S2 - Workplace Closure
- 79 3. S3 - Cancel Public Events
- 80 4. S4 - Close Public Transport
- 81 5. S5 - Public Information Campaign
- 82 6. S6 - Domestic Travel Bans
- 83 7. S7 - International Travel Bans

84 The OxCGRT stringency index is given by:

$$p = \frac{1}{7} \sum_{J=1}^7 p_J, \quad (1)$$

85 where  $p_J$  is defined by:

$$p_J = \frac{S_J + G_J}{N_J + 1}, \quad (2)$$

86 with  $G_J = 1$  if the effect is general (and 0 otherwise), and  $N_J$  is the cardinality of the intervention measure [22, 20].  
 87 In the case where there is no requirement of general vs. targeted (S7), the +1 in the denominator and the  $G_J$  in the  
 88 numerator are omitted from the equation to form:

| Label  | NPI                           |
|--------|-------------------------------|
| $U1$ : | Stay at Home Order            |
| $U2$ : | Educational Facilities Closed |
| $U3$ : | Non-essential Services Closed |
| $U4$ : | Travel Severely Limited       |
| $U5$ : | Initial Workplace Closure     |
| $U6$ : | Banned Mass Gatherings        |

Table 1: Table Showing US Interventions Acquired from the IHME.

$$p_7 = \frac{S_7}{N_7}, \quad (3)$$

89 The OxCGRT database contains data for 133 countries however no data is included for US states. In order to be  
 90 able to compare US states to countries, we mapped the known available levels of intervention in the US to match  
 91 the OxCGRT system as accurately as possible. We used the Institute for Health Metrics and Evaluation (IHME) [23]  
 92 dashboard to obtain six dates at which specific states imposed different NPIs. At the time of development the known  
 93 NPIs for the US taken from the IHME dashboard were as follows:

94 Although some of the above US interventions were not directly comparable to the OxCGRT indicators, their  
 95 individual impact on the stringency index was still valid and should be included in the calculation of the index. By  
 96 including  $U1$  and  $U3$  with the appropriate weight into the calculation use for the OxCGRT index, an equivalent US  
 97 index is created. The following equation was developed:

$$p = \frac{1}{7}(1(v_1) + 1(v_2) + 1(v_3) + 2(v_4) + 1(v_5) + 1(v_6)), \quad (4)$$

98 where  $v_i$  is a number out of 100 indicating the extent to which each of the interventions are imposed.

99 Due to lack of data on the *Travel Severely Limited* intervention on the IHME dashboard. It was required to source  
 100 US travel restrictions information from other US news sources [24, 25, 26]. Using the same logic used by OxCGRT  
 101 team the following equation for  $v_i$  was introduced:

$$v_i = 100 \frac{U_i}{N_i}, \quad (5)$$

102 where  $U_i$  is ordinal and can vary from 0 to the cardinality of the specific intervention measure,  $N_i$ . This is done to  
 103 incorporate levels of implementation of a specific intervention into the stringency calculation. Based on the data the  
 104 only intervention that requires levels of implementation is the  $U_4$  intervention. The ordinal levels, 0-3, were allocated  
 105 for  $U_4$  in order to include the relevant levels of implementation that were found to be applicable to the *Travel Severely*  
 106 *Limited* intervention.

### 107 3. Materials and Methods

#### 108 3.1. The epidemiological parameters

109 Our study uses one of the simplest compartmental models in the form of SIRD modelling. The model consists of  
 110 four compartments,  $S, I, R$  and  $D$  which represent the number of susceptible population, active cases, recoveries and  
 111 number of deaths, respectively. The variables represent the number of people at the particular day in each compart-  
 112 ment. The infection rate,  $\beta$ , the recovery rate,  $\gamma$ , and the mortality rate,  $d$  are defined. These parameters are given in  
 113 the following formulae:

$$\beta = \frac{dI + dR + dD}{dt}, \quad (6)$$

114 where

$$\gamma = \frac{dR}{dt} \quad (7)$$

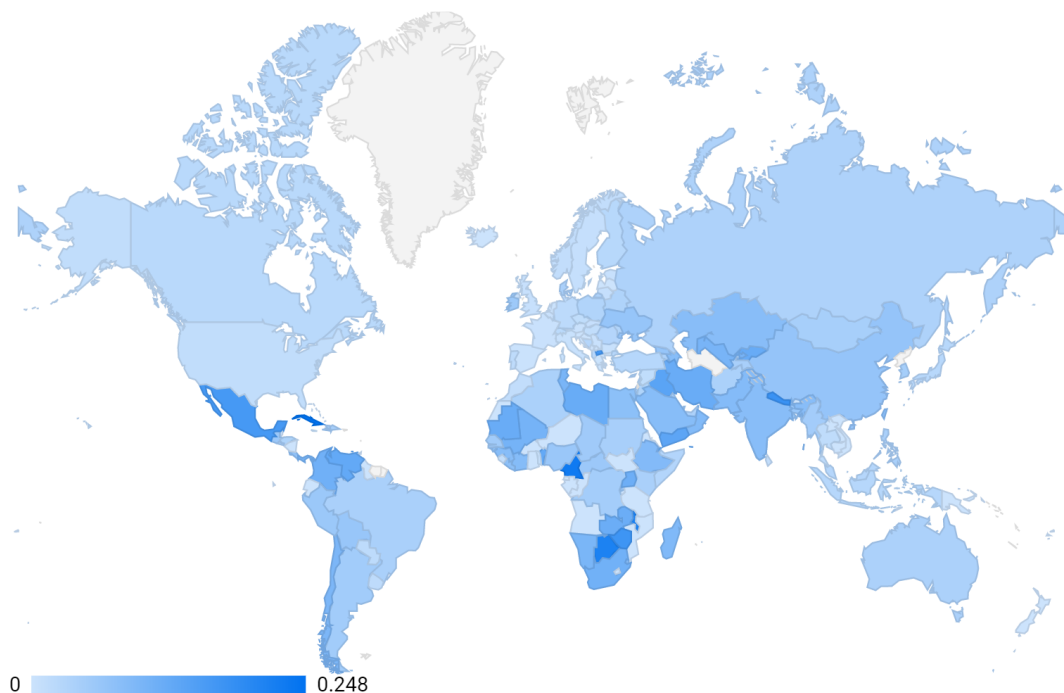

Figure 2: World map with daily  $\beta$  infection rate for the 1<sup>st</sup> June 2020

115 and

$$d = \frac{dD}{dt} \quad (8)$$

116 These parameters are computed on a daily basis. Figure 2 shows a snapshot of the infection rate globally for June  
117 1<sup>st</sup> 2020. A global analysis indicates that the recovery rate evolves slowly with time. In addition, the US stopped  
118 reporting recoveries early on in the pandemic. This data sample is particularly relevant to the analysis in that the  
119 differentials of temperature and humidity in the US are large. As a result, the temperature and humidity gradients are  
120 computed with respect to the infection rate, as opposed to the reproductive number.

### 121 3.2. Disentangling climate modulations and the temporal evolution

122 As indicated in Section 1, the pandemic evolves in time undergoing different phases within a wave. A wave cycle  
123 can span months during which climate modulations may induce significant variations in temperature and humidity.  
124 Therefore, it is of the essence to make every effort to disentangle the intrinsic temporal evolution of a pandemic due to  
125 the specific characteristics of a country from climate modulations that may potentially impact it. This is a challenging  
126 exercise for a country in isolation. In the absence of a reliable overarching model, potential seasonality effects driven  
127 by regional temperature and humidity need to be extracted iteratively by means of a global analysis that later could be  
128 feed into a more localised scrutiny of the pandemic.

129 Should significant temperature and humidity gradients be impacting the dynamics of the pandemic at the macro-  
130 scopic level, variations should be observed in a global and regional analysis of the data. In order to probe these  
131 potential gradients one has to compare epidemiological indexes in groups of countries that are at similar stages of the  
132 temporal evolution of the pandemic. This can be achieved by comparing infection rates as a function of the stringency  
133 index of the NPIs.

134 Most of the countries that have undergone the first wave went through at least three stages. Following the establish-  
135 ment of community transmission, a first stage in the pandemic is characterised by relatively large infection rates. At  
136 this point NPIs are not stringent or not sufficiently adhered to by the population. This state is referred to here as loose

|               | Countries with > 5000 Cases | No Split | Loose Control | Tight Control |
|---------------|-----------------------------|----------|---------------|---------------|
| Asia          | 18                          | 1695     | 348           | 248           |
| Africa        | 8                           | 651      | 72            | 126           |
| Europe        | 25                          | 2124     | 411           | 336           |
| North America | 6                           | 493      | 56            | 84            |
| South America | 7                           | 572      | 51            | 98            |
| Oceania       | 1                           | 99       | 29            | 14            |
| Global        | 65                          | 5634     | 967           | 906           |
| USA           | 22*                         | 1617     | 541           | 595           |

\*States with more than 2000 cases.

Table 2: Number of data points for each of the three cases considered in this study.

control. At this stage, the cumulative distribution of cases can be approximated by a single exponential. A second stage follows, where stringent NPIs are enforced. These measures are referred to here as tight control. The growth of cases decelerates, where the pandemic reaches an apex. The infection rates decrease more or less monotonically and, in many cases, the reproductive number drops below unity. Finally, a third stage follows, where Governments release lockdown measures more or less gradually with different levels of success.

As discussed in Section 1, an attempt is made here to avoid picking up false temperature and humidity gradients when comparing infection rates in countries or groups of countries that happen to be at different stages of the pandemic. A first iteration is performed here by evaluating temperature and humidity gradients in groups of countries that display "loose" or "tight" NPI control. This approach is effective as long the data displays sufficiently large differentials of temperature and humidity. In this light the data from the States of the US is an interest showcase, where progression of the pandemic displayed strong commonalities in the backdrop of large temperature and humidity differentials, e.g. the Midwest versus Florida and Arizona.

Given the differentials present in the data (see Section 4), this first iteration should be able to pick up gradients greater or comparable to  $10^{-2}$ . In order to refine the measurement of the gradient an approach more sophisticated than the discrete classification adopted here. For this purpose, parametric corrections would need to be implemented in the data to account for the stringency and the efficiency of the NPIs.

### 3.3. Data collection and processing

The study is done at the global level starting from January 24<sup>th</sup> 2020 up to June 1<sup>st</sup> 2020. The United States of America is considered separately because the stringency index is not available in the OxCGRT data base. The stringency index for the different states of the US is computed by the authors (see Section 2). This is done for the period January 25<sup>th</sup> 2020 to April 14<sup>th</sup>, 2020.

The epidemiological data was collected from the Johns Hopkins University data repository which contains the global daily updates of the total cases, number of death and recovery cases [27]. In our study we focus on three cases. For the first case we consider all countries with more than 5000 total cases and US States with more than 2000 total cases. This is enforced in order to ensure that the epidemiological parameters be stable, as these are calculated on a daily basis.

For the second case, which is called loose control, we look at points where infection rate is not 0 and the stringency index is less than 50; lastly we have the tight control data sample, which focuses on the the period that starts two weeks after the maximum stringency index is achieved.

Table 2 shows the of countries with more than 5000 cases and US States with more than 2000. The number of data points before and after splitting into loose and tight NPI control are also given in Table 2.<sup>1</sup>

### 3.4. Temperature and Relative Humidity

The Integrated Surface Database (ISD) belonging to the National Oceanic and Atmospheric Administration (NOAA) consists of hourly and synoptic observations from over 35 000 stations worldwide [28]. These stations are identified

<sup>1</sup>A data point is defined a vector of epidemiological parameters such that the estimated infection rate is not equal to zero. Data points are estimated on a daily basis.



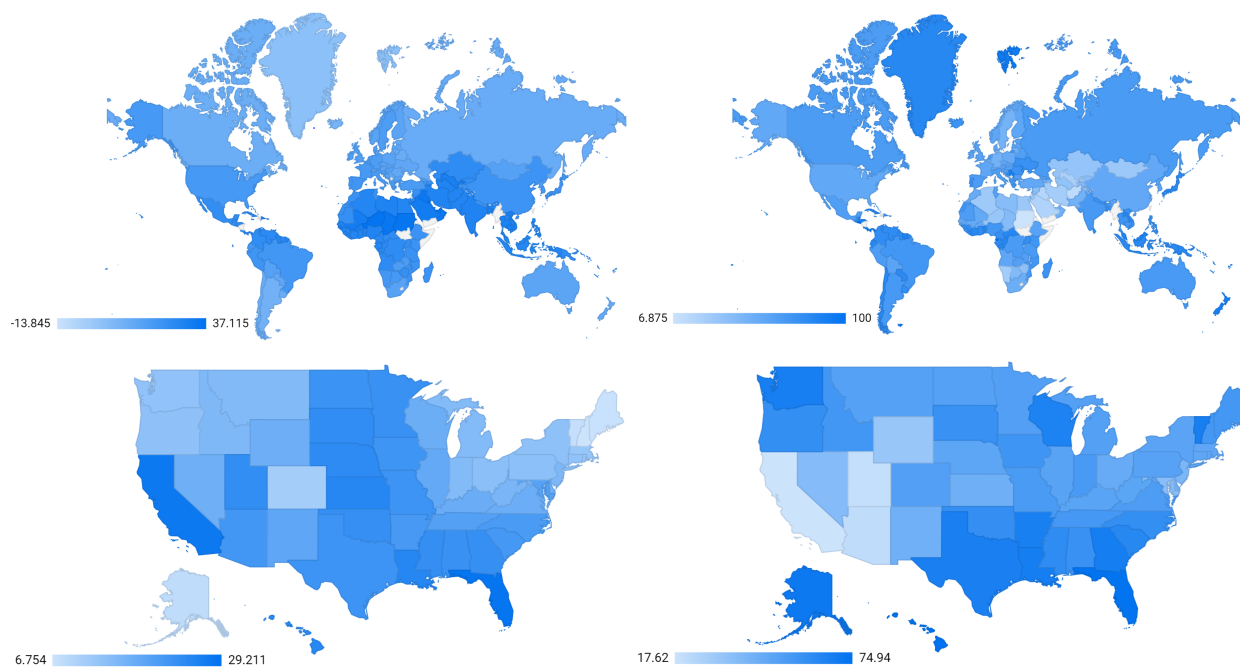

Figure 3: Maps of temperature (left) and relative humidity (right). Top plots depict global map, with USA being the bottom. Data correspond to June 1<sup>st</sup> 2020.

171 by 11 character code made up of USAF (U.S. Air Force) and WBAN (Weather-Bureau-Army-Navy) fixed weather  
 172 station identifiers in the database. The database contains different climate change parameters such as temperature, dew  
 173 point, wind speed and sea level pressure, amongst others. Relevant data for this study, dew point,  $T_d$ , and temperature,  
 174  $T$ , both measured in tenths of degrees Celsius ( $^{\circ}\text{C}$ ) was extracted using station identifiers and averaged per specific  
 175 regions or countries [29]. The former indicates the quantity of moisture in the air whilst the latter indicate the air  
 176 temperature. Other variables, such as saturated vapor pressure which measures the pressure applied by air mixed with  
 177 water vapor [30], actual vapor pressure which measures the water vapor in a volume of air [31] and relative humidity  
 178 are computed.

179 Vapor pressure ( $E$ ) is calculated using temperature using the expression:

$$E(\text{hPa}) = 6.11 \times e^{\left(\frac{7.5 \times T}{237.3 + T}\right)}. \quad (9)$$

180 Saturated vapor pressure ( $E_s$ ) uses the dew point with:

$$E_s(\text{hPa}) = 6.11 \times e^{\left(\frac{7.5 \times T_d}{237.3 + T_d}\right)}. \quad (10)$$

181 Here we use the relative humidity. This is given by the ratio of the two pressures and is measured in percentage:

$$RH = \frac{E}{E_s} \times 100\% \quad (11)$$

182 Figure 3 shows the global and USA maps with daily temperatures (left) and relative humidity (right) for June 1<sup>st</sup>  
 183 2020.

#### 184 4. Results and Discussion

185 The graphs in Figure 4 show the regression analysis of the transmission rate against temperature (top row) and  
 186 relative humidity (bottom row) for the overall global data set discussed in Section 3. Results are shown for all three

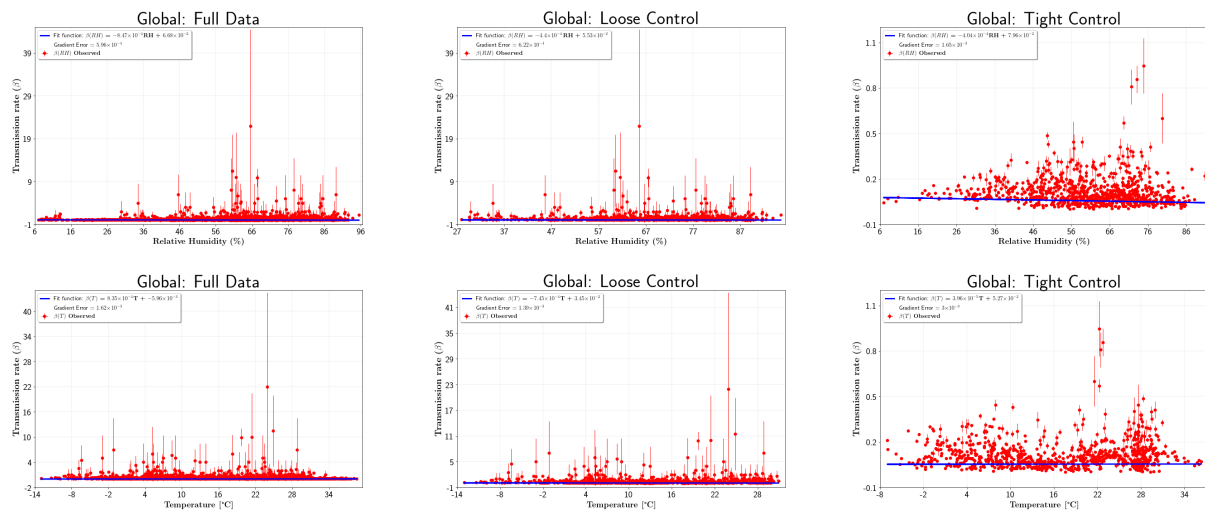

Figure 4: Regression analysis for relative humidity (top graphs) and temperature (bottom graphs) using global data, as detailed in Section 3. Results are shown for the full data set (left), loose control (centre) and tight control (right).

187 cases we have considered: the full data set, loose and tight controls, respectively. One appreciates the wide span  
 188 of temperatures and relative humidity displayed by the data sample used here. The differential in relative humidity  
 189 ranges from 90% to 80% for the full data set and the tight control sample, respectively. The corresponding differentials  
 190 for temperature are 50 °C and 44 °C, respectively. Temperatures remain in the range between -15 °C and 40 °C. The  
 191 differentials displayed in the data are sufficiently large to pick up gradients down to  $10^{-2}$ . For this purpose a regression  
 192 analysis is performed with a first order polynomial of temperature and relative humidity. The available data does not  
 193 seem to indicate that more complex functional forms are required. Statistical error propagation for the epidemiological  
 194 parameters is performed.

195 Tables 3 and 4 report the result of the regression analysis for the temperature and relative humidity analyses,  
 196 respectively. Results are given in terms of central values and the 68% Confidence Intervals. The compatibility with  
 197 the zero-gradient (absence of gradient) hypothesis is evaluated by means of a  $p$ -value analysis. Results from the global  
 198 analysis indicate that the gradients are below  $10^{-3}$  and that results are compatible with the zero-gradient hypothesis  
 199 with a probability of better than 15%. These results indicate that the correlation between temperature and relative  
 200 humidity with infection rates is weak.

201 The analysis is also performed for various continents, where the American continent is split into North, USA and  
 202 South America. Results are also given in Tables 3 and 4 for temperature and relative humidity, respectively. In few  
 203 instances the compatibility of the observed result with the zero-gradient hypothesis falls below 0.1%. However, this  
 204 level of disagreement with the zero-gradient hypothesis is not observed consistently across the three data sets for any  
 205 of the geographical regions considered here.

206 In the absence of conclusive evidence of temperature or humidity gradients in the data, upper limits on the absolute  
 207 value of the gradients are set. These are set using the global data set with the tight control requirement. This choice  
 208 yields more conservative limits compared to other data sets. This procedure yields  $6 \cdot 10^{-3} \text{ } ^\circ\text{C}^{-1}$  and  $3.3 \cdot 10^{-3} (\%)^{-1}$   
 209 upper limits on the absolute values of the temperature and relative humidity gradients, respectively, with a 95%  
 210 Confidence Level.

211 The procedure followed here (see Section 3) is intended to capture the leading terms in the underlying dynamics  
 212 driven by temperature or humidity. These terms appear small and seem compatible with the intrinsic uncertainties  
 213 derived from reporting and epidemiological parameters. Given that the size of the terms are below the threshold of the  
 214 analysis sensitivity, further implementation of more sophisticated functional forms of multi-dimensional approaches  
 215 are not warranted here.

216 It is relevant to note that the weak correlation between temperature and humidity with the infection rate is observed  
 217 in the full data set, even before the classification according to the severity of the NPIs is implemented. This seems to



|               | Full Data                                    |            | Loose Control                                |            | Tight Control                                |            |
|---------------|----------------------------------------------|------------|----------------------------------------------|------------|----------------------------------------------|------------|
|               | Gradient ( $^{\circ}\text{C}^{-1}$ )         | $p$ -value | Gradient ( $^{\circ}\text{C}^{-1}$ )         | $p$ -value | Gradient ( $^{\circ}\text{C}^{-1}$ )         | $p$ -value |
| Asia          | $2.17 \cdot 10^{-3} \pm 4.31 \cdot 10^{-4}$  | < 0.001    | $-4.17 \cdot 10^{-3} \pm 2.79 \cdot 10^{-3}$ | 0.136      | $1.70 \cdot 10^{-3} \pm 1.38 \cdot 10^{-3}$  | 0.218      |
| Africa        | $-1.37 \cdot 10^{-3} \pm 5.61 \cdot 10^{-4}$ | 0.014      | $3.52 \cdot 10^{-3} \pm 2.90 \cdot 10^{-3}$  | 0.226      | $-1.45 \cdot 10^{-3} \pm 1.83 \cdot 10^{-3}$ | 0.427      |
| Europe        | $-1.60 \cdot 10^{-3} \pm 1.91 \cdot 10^{-3}$ | 0.402      | $-9.96 \cdot 10^{-4} \pm 1.81 \cdot 10^{-3}$ | 0.581      | $-3.00 \cdot 10^{-3} \pm 4.52 \cdot 10^{-3}$ | 0.511      |
| North America | $3.80 \cdot 10^{-4} \pm 5.98 \cdot 10^{-4}$  | 0.525      | $4.33 \cdot 10^{-3} \pm 5.67 \cdot 10^{-4}$  | < 0.001    | $-1.32 \cdot 10^{-3} \pm 5.04 \cdot 10^{-4}$ | 0.008      |
| South America | $-3.51 \cdot 10^{-3} \pm 5.48 \cdot 10^{-3}$ | 0.005      | $-1.97 \cdot 10^{-2} \pm 2.78 \cdot 10^{-3}$ | < 0.001    | $-1.87 \cdot 10^{-3} \pm 4.06 \cdot 10^{-3}$ | 0.644      |
| Oceania       | $1.49 \cdot 10^{-3} \pm 1.10 \cdot 10^{-3}$  | 0.177      | $-2.94 \cdot 10^{-2} \pm 7.08 \cdot 10^{-3}$ | < 0.001    | $1.55 \cdot 10^{-3} \pm 2.39 \cdot 10^{-3}$  | 0.516      |
| USA           | $-5.75 \cdot 10^{-4} \pm 2.51 \cdot 10^{-3}$ | 0.819      | $2.32 \cdot 10^{-3} \pm 2.92 \cdot 10^{-3}$  | 0.427      | $-2.22 \cdot 10^{-3} \pm 3.70 \cdot 10^{-3}$ | 0.548      |
| Global        | $8.32 \cdot 10^{-4} \pm 1.63 \cdot 10^{-3}$  | 0.607      | $-7.45 \cdot 10^{-4} \pm 1.39 \cdot 10^{-3}$ | 0.593      | $3.96 \cdot 10^{-5} \pm 3.00 \cdot 10^{-3}$  | 0.989      |

Table 3: Temperature gradients with 68% Confidence Intervals and  $p$ -values for the zero-gradient hypothesis (see text).

|               | Full Data                                    |            | Loose Control                                |            | Tight Control                                |            |
|---------------|----------------------------------------------|------------|----------------------------------------------|------------|----------------------------------------------|------------|
|               | Gradient ( $\%^{-1}$ )                       | $p$ -value | Gradient ( $\%^{-1}$ )                       | $p$ -value | Gradient ( $\%^{-1}$ )                       | $p$ -value |
| Asia          | $-2.71 \cdot 10^{-4} \pm 6.15 \cdot 10^{-4}$ | 0.660      | $-1.17 \cdot 10^{-3} \pm 6.49 \cdot 10^{-4}$ | 0.070      | $-5.66 \cdot 10^{-4} \pm 5.59 \cdot 10^{-4}$ | 0.312      |
| Africa        | $-3.80 \cdot 10^{-4} \pm 1.57 \cdot 10^{-4}$ | 0.016      | $-3.17 \cdot 10^{-3} \pm 7.90 \cdot 10^{-4}$ | < 0.001    | $-5.56 \cdot 10^{-4} \pm 6.19 \cdot 10^{-4}$ | 0.370      |
| Europe        | $-8.08 \cdot 10^{-4} \pm 5.72 \cdot 10^{-4}$ | 0.158      | $-2.33 \cdot 10^{-4} \pm 7.08 \cdot 10^{-4}$ | 0.742      | $-8.64 \cdot 10^{-4} \pm 1.96 \cdot 10^{-3}$ | 0.659      |
| North America | $-1.12 \cdot 10^{-3} \pm 7.35 \cdot 10^{-4}$ | 0.095      | $-4.96 \cdot 10^{-3} \pm 1.35 \cdot 10^{-3}$ | < 0.001    | $-2.34 \cdot 10^{-3} \pm 1.27 \cdot 10^{-3}$ | 0.067      |
| South America | $-3.35 \cdot 10^{-3} \pm 2.35 \cdot 10^{-3}$ | 0.155      | $-6.97 \cdot 10^{-3} \pm 2.11 \cdot 10^{-3}$ | < 0.001    | $3.19 \cdot 10^{-3} \pm 3.52 \cdot 10^{-3}$  | 0.365      |
| Oceania       | $1.31 \cdot 10^{-3} \pm 5.16 \cdot 10^{-4}$  | 0.011      | $-3.57 \cdot 10^{-3} \pm 1.65 \cdot 10^{-3}$ | 0.030      | $1.87 \cdot 10^{-3} \pm 5.81 \cdot 10^{-4}$  | 0.001      |
| USA           | $4.96 \cdot 10^{-4} \pm 3.71 \cdot 10^{-3}$  | 0.894      | $6.86 \cdot 10^{-3} \pm 4.46 \cdot 10^{-3}$  | 0.124      | $-2.24 \cdot 10^{-3} \pm 5.63 \cdot 10^{-3}$ | 0.691      |
| Global        | $-8.47 \cdot 10^{-4} \pm 5.96 \cdot 10^{-4}$ | 0.155      | $-4.40 \cdot 10^{-4} \pm 6.22 \cdot 10^{-4}$ | 0.480      | $-4.04 \cdot 10^{-4} \pm 1.65 \cdot 10^{-3}$ | 0.807      |

Table 4: Relative Humidity gradients with 68% Confidence Intervals and  $p$ -values for the zero-gradient hypothesis (see text).

218 indicate that the size of the geographical footprint could play a significant role in removing biases. These biases could  
 219 have been responsible for apparent gradients observed in studies performed with smaller data sets collected at earlier  
 220 stages of the global pandemic.

## 221 5. Conclusions

222 Here we evaluate potential temperature and humidity impact on the infection rate of COVID-19. The data set used  
 223 here comprises a large geographical footprint of data up to June 10<sup>th</sup> 2020. This period covers the "first wave" of the  
 224 pandemic in a large number of countries.

225 Our analysis indicates that it is critical to evaluate temperature and humidity gradients in different countries or  
 226 regions at similar stages of the pandemic in order to avoid picking up false gradients. The degree of severity of NPI  
 227 policy is found to be a good measure of the progression of the pandemic in a given country. As a result, data points  
 228 are classified according to the stringency index of the NPIs in order to ensure that comparisons are made on equal  
 229 footing.

230 We find that temperature and relative humidity gradients do not significantly deviate from the zero-gradient hy-  
 231 pothesis. This implies that changes in temperature and relative humidity do not seem to have an effect on the value  
 232 of the transmission rate or there is a small correlation between the transmission rate and temperature and relative  
 233 humidity. Our results seem to be in agreement with other studies that has concluded that there is no evidence as to  
 234 whether the spread of the COVID-19 is temperature dependent [16, 17, 18, 32].

235 In the absence of conclusive evidence of temperature or humidity gradients in the data, upper limits on the absolute  
 236 value of the gradients are set. The procedure chosen here yields  $6 \cdot 10^{-3} \text{ }^{\circ}\text{C}^{-1}$  and  $3.3 \cdot 10^{-3} (\%)^{-1}$  upper limits on the  
 237 absolute values of the temperature and relative humidity gradients, respectively, with a 95% Confidence Level.

238 The results obtained here speak to the absence of significant macroscopic temperature or humidity gradients.  
 239 However, these results do not preclude the existence of seasonality effects in infection rates. It indicates that seasonal  
 240 effects are likely to be nuanced and should not be reduced to temperature or humidity differentials.

## 241 References

- 242 [1] E. D. Kilbourne, Influenza pandemics of the 20<sup>th</sup> century, *Emerging infectious diseases* 12 (2006) 9.
- 243 [2] D. J. Alexander, Avian influenza: Historical aspects, *Avian Diseases* 47 (2003) 4–13.
- 244 [3] B. A. Cunha, Influenza: historical aspects of epidemics and pandemics, *Infectious Disease Clinics* 18 (2004) 141–155.
- 245 [4] I. Hall, R. Gani, H. Hughes, S. Leach, Real-time epidemic forecasting for pandemic influenza, *Epidemiology & Infection* 135 (2007)
- 246 372–385.
- 247 [5] J. Wang, K. Tang, K. Feng, W. Lv, High temperature and high humidity reduce the transmission of covid-19, Available at SSRN 3551767
- 248 (2020).
- 249 [6] Y. Ma, Y. Zhao, J. Liu, X. He, B. Wang, S. Fu, J. Yan, J. Niu, J. Zhou, B. Luo, Effects of temperature variation and humidity on the death of
- 250 covid-19 in wuhan, china, *Science of The Total Environment* (2020) 138226.
- 251 [7] Q. Li, X. Guan, P. Wu, X. Wang, L. Zhou, Y. Tong, R. Ren, K. S. Leung, E. H. Lau, J. Y. Wong, et al., Early transmission dynamics in wuhan,
- 252 china, of novel coronavirus–infected pneumonia, *New England Journal of Medicine* (2020).
- 253 [8] WHO Director-General’s opening remarks at the media briefing on COVID-19 - 11 March 2020, 2020 (accessed June 18, 2020).
- 254 [https://www.who.int/dg/speeches/detail/who-director-general-s-opening-remarks-at-the-media-briefing](https://www.who.int/dg/speeches/detail/who-director-general-s-opening-remarks-at-the-media-briefing-on-covid-19---11-march-2020)
- 255 [-on-covid-19---11-march-2020](https://www.who.int/dg/speeches/detail/who-director-general-s-opening-remarks-at-the-media-briefing-on-covid-19---11-march-2020).
- 256 [9] Coronavirus disease (COVID-19) Situation Report – 150, 2020 (accessed June 18, 2020).
- 257 [https://www.who.int/docs/default-source/coronaviruse/situation-reports/20200618-covid-19-sitrep-150.pdf](https://www.who.int/docs/default-source/coronaviruse/situation-reports/20200618-covid-19-sitrep-150.pdf?sfvrsn=aa9fe9cf_2)
- 258 [?sfvrsn=aa9fe9cf\\_2](https://www.who.int/docs/default-source/coronaviruse/situation-reports/20200618-covid-19-sitrep-150.pdf?sfvrsn=aa9fe9cf_2).
- 259 [10] J. F.-W. Chan, S. Yuan, K.-H. Kok, K. K.-W. To, H. Chu, J. Yang, F. Xing, J. Liu, C. C.-Y. Yip, R. W.-S. Poon, et al., A familial cluster of
- 260 pneumonia associated with the 2019 novel coronavirus indicating person-to-person transmission: a study of a family cluster, *The Lancet* 395
- 261 (2020) 514–523.
- 262 [11] G. Kampf, D. Todt, S. Pfaender, E. Steinmann, Persistence of coronaviruses on inanimate surfaces and their inactivation with biocidal agents,
- 263 *Journal of Hospital Infection* 104 (2020) 246–251.
- 264 [12] K.-H. Chan, J. M. Peiris, S. Lam, L. Poon, K. Yuen, W. H. Seto, The effects of temperature and relative humidity on the viability of the sars
- 265 coronavirus, *Advances in virology* 2011 (2011).
- 266 [13] M. F. F. Sobral, G. B. Duarte, A. I. G. da Penha Sobral, M. L. M. Marinho, A. de Souza Melo, Association between climate variables and
- 267 global transmission of sars-cov-2, *Science of The Total Environment* 729 (2020) 138997.
- 268 [14] B. Oliveiros, L. Caramelo, N. C. Ferreira, F. Caramelo, Role of temperature and humidity in the modulation of the doubling time of covid-19
- 269 cases, *medRxiv* (2020).
- 270 [15] J. Liu, J. Zhou, J. Yao, X. Zhang, L. Li, X. Xu, X. He, B. Wang, S. Fu, T. Niu, et al., Impact of meteorological factors on the covid-19
- 271 transmission: A multi-city study in china, *Science of the Total Environment* (2020) 138513.
- 272 [16] N. Iqbal, Z. Fareed, F. Shahzad, X. He, U. Shahzad, M. Lina, Nexus between covid-19, temperature and exchange rate in wuhan city: New
- 273 findings from partial and multiple wavelet coherence, *Science of The Total Environment* (2020) 138916.
- 274 [17] M. Jahangiri, M. Jahangiri, M. Najafgholipour, The sensitivity and specificity analyses of ambient temperature and population size on the
- 275 transmission rate of the novel coronavirus (covid-19) in different provinces of iran, *Science of The Total Environment* (2020) 138872.
- 276 [18] Y. Yao, J. Pan, Z. Liu, X. Meng, W. Wang, H. Kan, W. Wang, No association of covid-19 transmission with temperature or uv radiation in
- 277 chinese cities, *European Respiratory Journal* 55 (2020).
- 278 [19] D. N. Prata, W. Rodrigues, P. H. Bermejo, Temperature significantly changes covid-19 transmission in (sub) tropical cities of brazil, *Science*
- 279 *of the Total Environment* (2020) 138862.
- 280 [20] Oxford coronavirus government response tracker, online [https://www.bsg.ox.ac.uk/research/research-projects/coronavirus-government-](https://www.bsg.ox.ac.uk/research/research-projects/coronavirus-government-response-tracker)
- 281 [response-tracker](https://www.bsg.ox.ac.uk/research/research-projects/coronavirus-government-response-tracker), accessed 14 April, 2020.
- 282 [21] J. Choma, F. Correa, S. Dabhi, B. Dwolatzky, L. Dwolatzky, K. Hayasi, C. B. Lieberman, B. Mellado, K. Monnakgotla, J. Naude,
- 283 X. Ruan, F. Stevenson, Worldwide effectiveness of various non-pharmaceutical intervention control strategies on the global covid-
- 284 19 pandemic: A linearised control model, *medRxiv*, <https://www.medrxiv.org/content/early/2020/05/12/2020.04.30.20085316> (2020).
- 285 doi:10.1101/2020.04.30.20085316.
- 286 [22] University of oxford, calculation and presentation of the stringency index 2.0, online <https://www.bsg.ox.ac.uk>, accessed 14 April, 2020.
- 287 [23] University of washington, institute for health metrics and evaluation covid-19 projections, 2020.
- 288 [24] K. Schwartz, Driving and travel restrictions across the united states, 2020. URL: [https://www.nytimes.com/2020/04/10/travel/](https://www.nytimes.com/2020/04/10/travel/coronavirus-us-travel-driving-restrictions.html)
- 289 [coronavirus-us-travel-driving-restrictions.html](https://www.nytimes.com/2020/04/10/travel/coronavirus-us-travel-driving-restrictions.html).
- 290 [25] A. Salcedo, S. Yar, G. Cherehus, Coronavirus travel restrictions, across the globe, 2020. URL:
- 291 <https://www.nytimes.com/article/coronavirus-travel-restrictions.html>.
- 292 [26] P. Baker, U.s. to suspend most travel from europe as world scrambles to fight pandemic, 2020. URL:
- 293 <https://www.nytimes.com/2020/03/11/us/politics/anthony-fauci-coronavirus.html>.
- 294 [27] E. Dong, H. Du, L. Gardner, An interactive web-based dashboard to track covid-19 in real time, *The Lancet infectious diseases* 20 (2020)
- 295 533–534.
- 296 [28] ISD, Integrated Surface Database (ISD), 2020 (accessed July 17, 2020). <https://www.ncdc.noaa.gov/isd>.
- 297 [29] NOAA, Index of/data/global-hourly/archives/csv, 2020 (accessed June 16, 2020). [https://www.ncei.noaa.gov/data/global-hourly](https://www.ncei.noaa.gov/data/global-hourly/archive/csv/)
- 298 [/archive/csv/](https://www.ncei.noaa.gov/data/global-hourly/archive/csv/).
- 299 [30] J. Ratzlaff, Saturated vapor pressure, 2020 (accessed July 17, 2020). [http://www.piping-designer.com/index.php/](http://www.piping-designer.com/index.php/properties/fluid-mechanics/550-saturated-vapor-pressure)
- 300 [properties/fluid-mechanics/550-saturated-vapor-pressure](http://www.piping-designer.com/index.php/properties/fluid-mechanics/550-saturated-vapor-pressure).
- 301 [31] Relative Humidity, 2020 (accessed July 17, 2020). Department of Atmospheric Sciences (DAS) at the University of Illinois at Urbana-
- 302 Champaign, [http://ww2010.atmos.uiuc.edu/\(Gh\)/guides/mtr/cld/dvlp/rh.rxml: :text=Actual%20vapor%20pressure](http://ww2010.atmos.uiuc.edu/(Gh)/guides/mtr/cld/dvlp/rh.rxml#:text=Actual%20vapor%20pressure%20is%20a,a%20flat%20surface%20of%20water)
- 303 [%20is%20a,a%20flat%20surface%20of%20water](http://ww2010.atmos.uiuc.edu/(Gh)/guides/mtr/cld/dvlp/rh.rxml#:text=Actual%20vapor%20pressure%20is%20a,a%20flat%20surface%20of%20water).
- 304 [32] T. Jamil, I. Alam, T. Gojobori, C. M. Duarte, No evidence for temperature-dependence of the covid-19 epidemic (2020).
